# Supplementary material for: Dentofacial mini- and microesthetics as perceived by dental students: A cross-sectional multi-site study
Source: PubMed Central journal article supplement (PMC7067484; doi:10.1371/journal.pone.0230182), 2020-03-12
Supplement: pone.0230182.s001.pdf [file pone.0230182.s001.pdf]

## Dentofacial Aesthetics Instrument for Dental Students

[Please note that this is a demonstration of the structure of the questionnaire. The layout of the version administered to respondents is different.]

| 1. Demographic data (3 items)                                                                                                                                                             |                                                                                               |
|-------------------------------------------------------------------------------------------------------------------------------------------------------------------------------------------|-----------------------------------------------------------------------------------------------|
| <b>1.1 Sex</b>                                                                                                                                                                            | FEMALE / MALE                                                                                 |
| <b>1.2 Age (years)</b>                                                                                                                                                                    |                                                                                               |
| <b>1.3 Academic year</b>                                                                                                                                                                  | 1 2 3 4 5                                                                                     |
| 2. Self-Aesthetics I (multiple choice, 11 items)                                                                                                                                          |                                                                                               |
| <b>2.1 Have you ever avoided smiling because of the appearance of your teeth?</b>                                                                                                         | yes / no                                                                                      |
| <b>2.2 How do you smile for photos?</b>                                                                                                                                                   | with a full smile (lips open) / with a partial smile (lips partially open) / with closed lips |
| <b>2.3 Have you ever noticed that you were looking at others because you wished you had their smile?</b>                                                                                  | yes / no                                                                                      |
| <b>2.4 Would you like to change your smile?</b>                                                                                                                                           | yes / no                                                                                      |
| <b>2.5 Are you satisfied with the color of your teeth?</b>                                                                                                                                | yes / no / partly                                                                             |
| <b>2.6 In your opinion, are the shape and size of your teeth in harmony?</b>                                                                                                              | yes / no / partly                                                                             |
| <b>2.7 Are your teeth crowded?</b>                                                                                                                                                        | yes, in both arches / yes, in one of the arches / no                                          |
| <b>2.8 Does the line between your upper central incisors fall in the midline of your face?</b>                                                                                            | yes / no / I have never observed                                                              |
| <b>2.9 Does the line between your lower central incisors fall in the midline of your face?</b>                                                                                            | yes / no / I have never observed                                                              |
| <b>2.10 Do the lines between your upper and lower incisors fall in the same line?</b>                                                                                                     | yes / no / I have never observed                                                              |
| <b>2.11 Is your gum visible when you smile?</b>                                                                                                                                           | yes / no / I have never observed                                                              |
| 3. Self-Aesthetics II (rating, 6 items)                                                                                                                                                   |                                                                                               |
| <b>Instruction:</b> Please indicate your satisfaction with different aspects of your dental and facial aesthetics on a 1 to 5 scale, where 1 means “not at all” and 5 means “absolutely”. |                                                                                               |
| <b>3.1 How satisfied are you with the shape of your</b>                                                                                                                                   | 1 (not at all) 2 3 4 5 (absolutely)                                                           |

|                                                                                       |                                        |
|---------------------------------------------------------------------------------------|----------------------------------------|
| <b>teeth?</b>                                                                         |                                        |
| <b>3.2 How satisfied are you with the size of your teeth?</b>                         | 1 (not at all) 2 3 4 5 (absolutely)    |
| <b>3.3 How satisfied are you with the orderliness of your teeth?</b>                  | 1 (not at all) 2 3 4 5 (absolutely)    |
| <b>3.4 How satisfied are you with the whiteness of your teeth?</b>                    | 1 (not at all) 2 3 4 5 (absolutely)    |
| <b>3.5 How satisfied are you with the harmony between your teeth and lips?</b>        | 1 (not at all) 2 3 4 5 (absolutely)    |
| <b>3.6 How satisfied are you with the aesthetics of your smile in general?</b>        | 1 (not at all) 2 3 4 5 (absolutely)    |
| <b>4. Photo Rating (smile, A to E, 10 items, 5 images per item, with photo album)</b> |                                        |
| <b>4.1-4.10 Choose the image that you find the most attractive.</b>                   | A B C D E [with five different images] |
